# Supplementary material
Source: MDPI journal article supplement (https://www.mdpi.com/search?q=ijms-20-00413)
Supplement: s001 [file ijms-20-00413-s001.pdf]

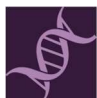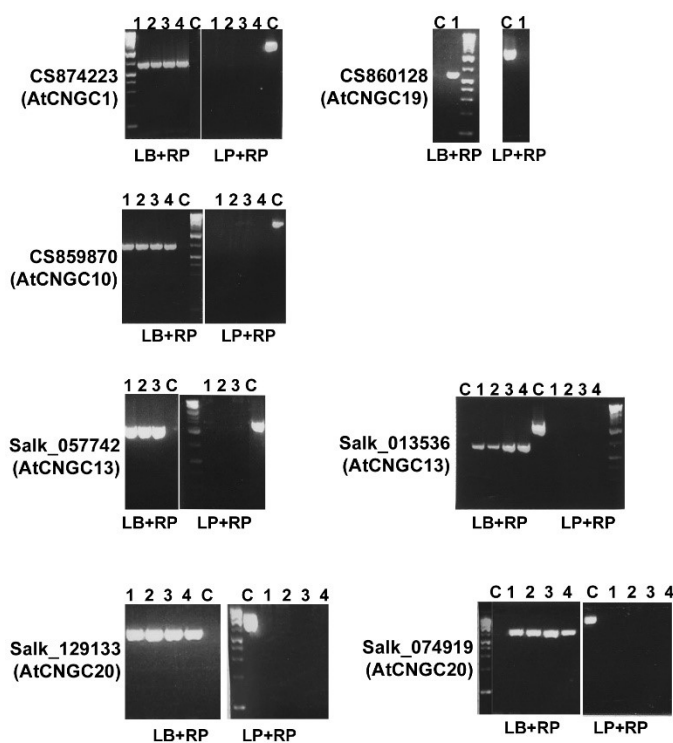

1  
2  
3  
4  
5  
6

**Figure S1. Genotyping of the T-DNA inserted *AtCNGC* mutants.** Genomic DNAs were prepared with rosette leaf-tissues of *Arabidopsis* wild-type (Col-0, C) and *atcngc* mutants (numbered). Genotyping PCR assays were performed using the genomic DNAs with sequence-specific primers (LP and RP) and LB1.3 (LB) primers that were provided in Salk Institute Genomic Analysis Laboratory (<http://signal.salk.edu/tdnaprimers.2.html>).

7

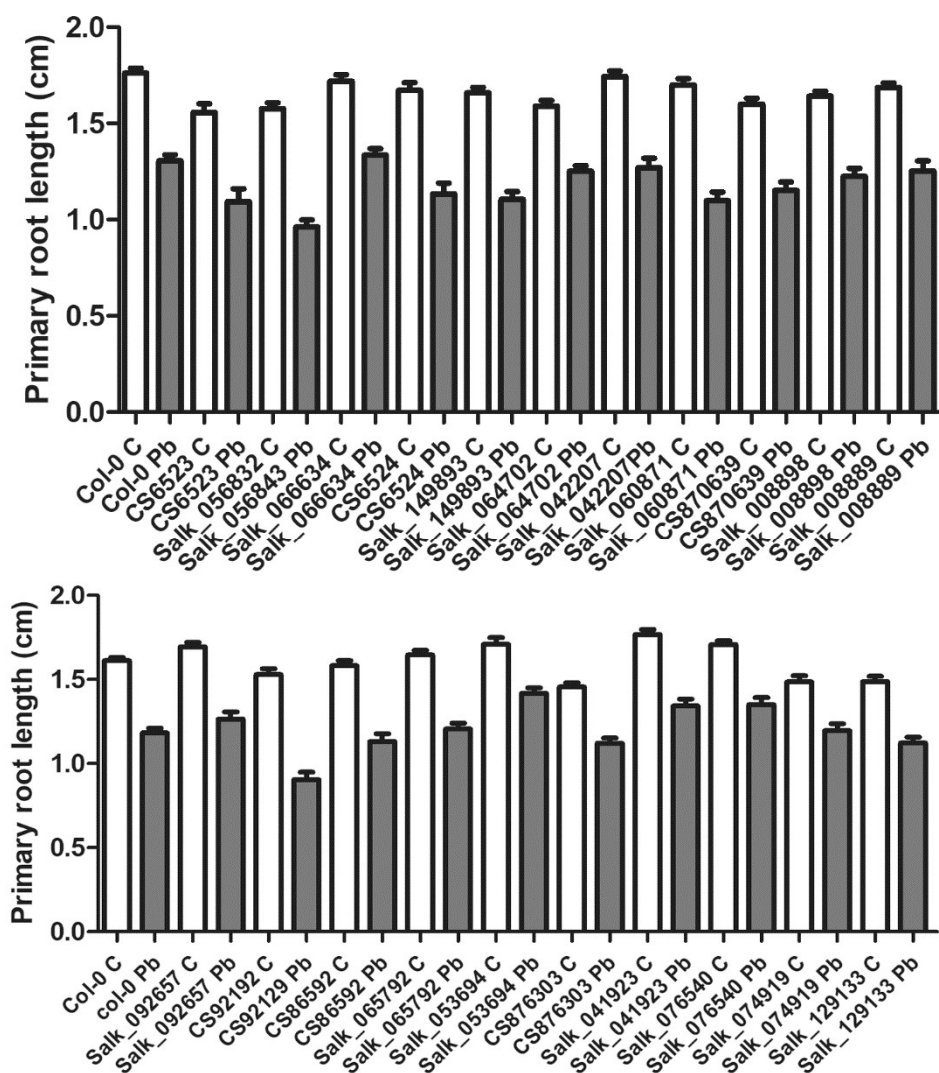

8  
9  
10  
11

**Figure S2.** Growth of *Arabidopsis atcngc* mutants on an agar medium containing Pb<sup>2+</sup>. *Arabidopsis* wild-type and *atcngc* mutants were grown for eight days on vertical agar medium plates containing 150 μM Pb(NO<sub>3</sub>)<sub>2</sub>. The values presented represent the mean ± se of primary root length (n = ≥ 80 plantlets per treatment from three replicated experiments). C: no Pb<sup>2+</sup> treatment

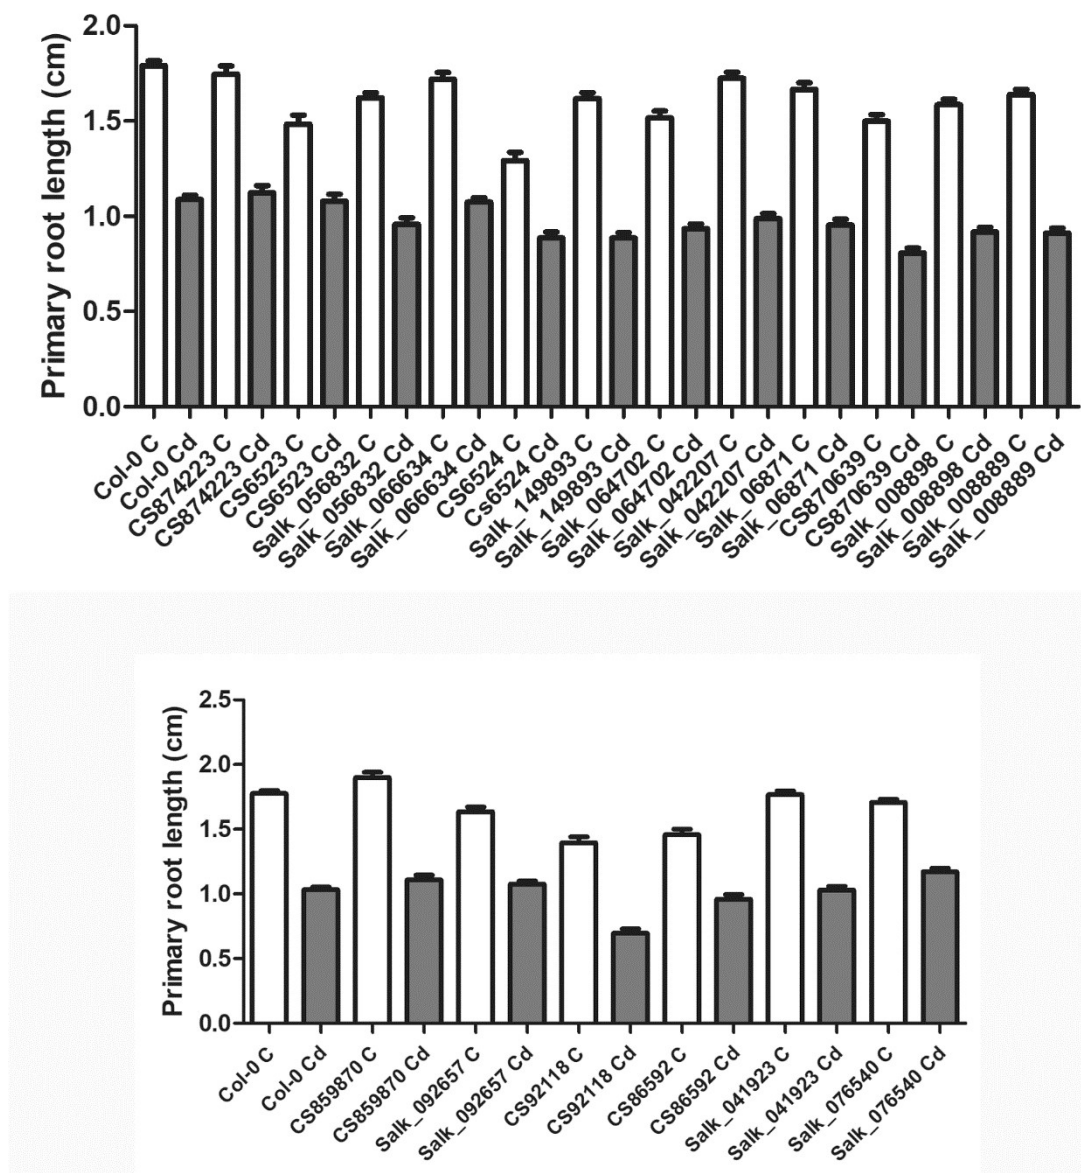

12

13

14

15

16

**Figure S3.** Growth of *Arabidopsis atcngc* mutants on an agar medium containing Cd<sup>2+</sup>. *Arabidopsis* wild-type (Col-0) and *atcngc* mutants were grown for eight days on vertical agar medium plates containing 55  $\mu$ M CdCl<sub>2</sub>·2.5H<sub>2</sub>O. The values presented represent the mean  $\pm$  se of primary root length ( $n \geq 80$  plantlets per treatment from three replicated experiments). C: no Cd<sup>2+</sup> treatment

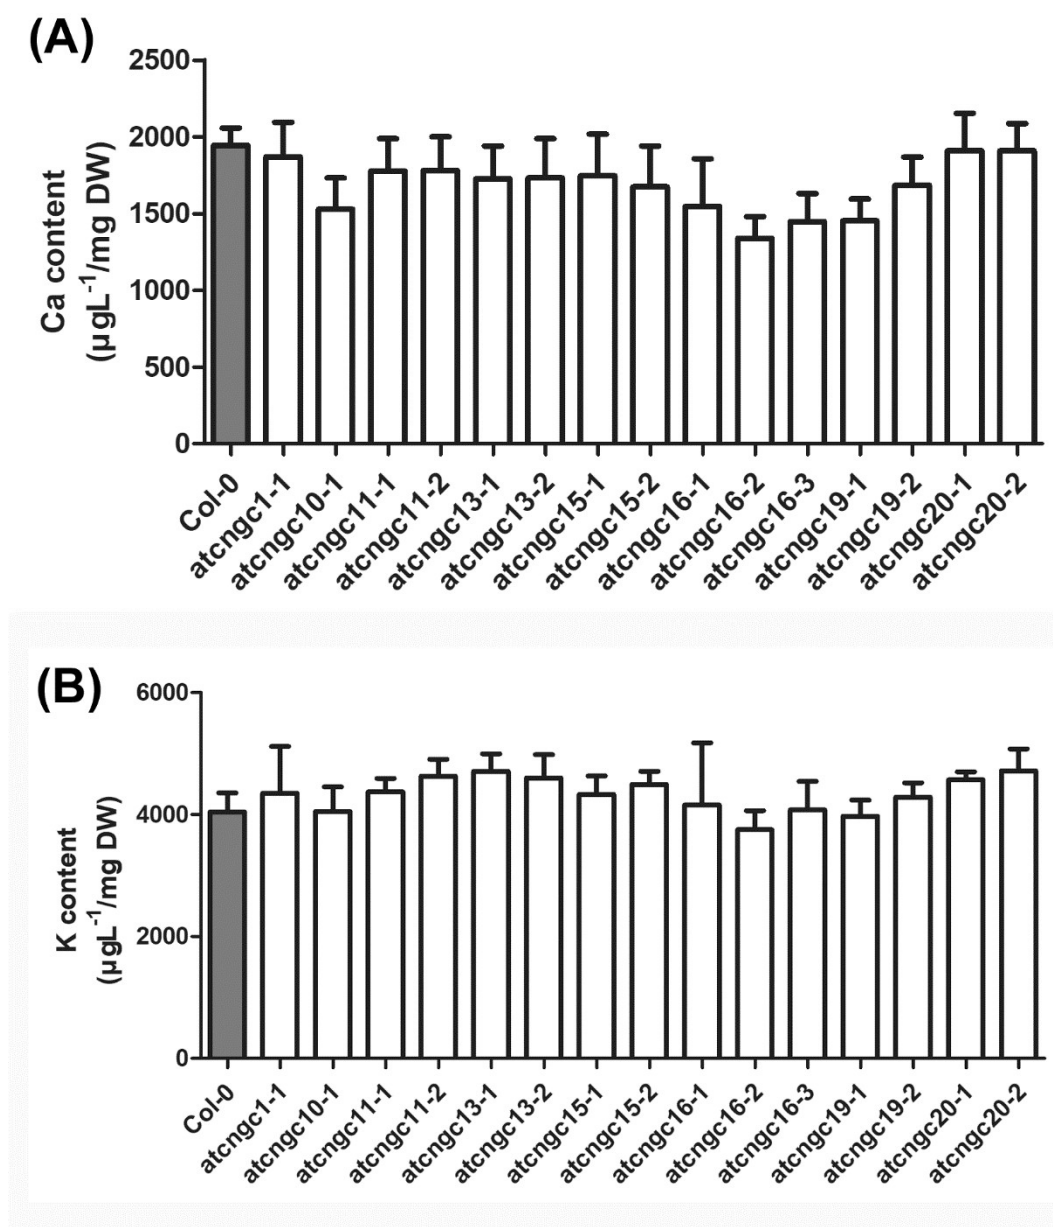

17

18

19

20

21

**Figure S4.**  $\text{Ca}^{2+}$  and  $\text{K}^{+}$  content in the *Arabidopsis* wild-type and *atcngc* mutants. Eight-day-old plantlets grown on media without heavy metal ions were collected from individuals from three replicated experiments and extracted in 60% (v/v)  $\text{HNO}_3$ . Elemental analysis was conducted with an ICP-MS System. Data presented represent the mean  $\pm$  se ( $n = 3$ ).
